# Supplementary material for: A hand-powered microfluidic system for portable and low-waste sample discretization
Source: Royal Society of Chemistry journal article supplement (doi:10.1039/d1lc00448d), 2021-01-01
Supplement: d1lc00448d4.pdf [file d1lc00448d4.pdf]

## Supporting Information

### A Hand-Powered Microfluidic System for Portable and Low-Waste

### Sample Discretization

Tengbao Xie<sup>a</sup>, Ping Wang<sup>b</sup>, Lei Wu<sup>c</sup>, Bangyong Sun<sup>a</sup>, Qiang Zhao<sup>a</sup>, and Gang Li<sup>a, \*</sup>

<sup>a</sup>*Key Laboratory of Optoelectronic Technology and Systems, Ministry of Education, Defense Key Disciplines Lab of Novel Micro-Nano Devices and System Technology, Chongqing University, Chongqing 400044, China*

<sup>b</sup>*Department of Biochemistry and Molecular Biology, Medical College, Henan University of Science and Technology, Luoyang, 471023, China*

<sup>c</sup>*State Key Lab of Transducer Technology, Shanghai Institute of Microsystem and Information Technology, Chinese Academy of Sciences, Shanghai 200050, China*

\*Corresponding author. Tel: +86-23-65111011(G. Li)

\*Email address: gang\_li@cqu.edu.cn (G. Li).

## **S1. Automatic positive microwell counting with ImageJ**

ImageJ is an open-source and widely-used image processing software developed by the National Institute of Health (NIH). Here, we used ImageJ as a tool for counting the positive microwells in the dPCR chip after PCR thermocycling. The detailed procedure is shown below:

1. Load the image which is needed to count. To do this, select: *File > open*.
2. Convert the image to grayscale. To do this, select: *Image > Type > 8-bit Grayscale*.
3. Adjust the threshold to distinguish positive wells from the background. To adjust the threshold, select: *Image > Adjust > Threshold*.
4. Identify and count the positive wells. To do this, select: *Analyze > Analyze Particles*.

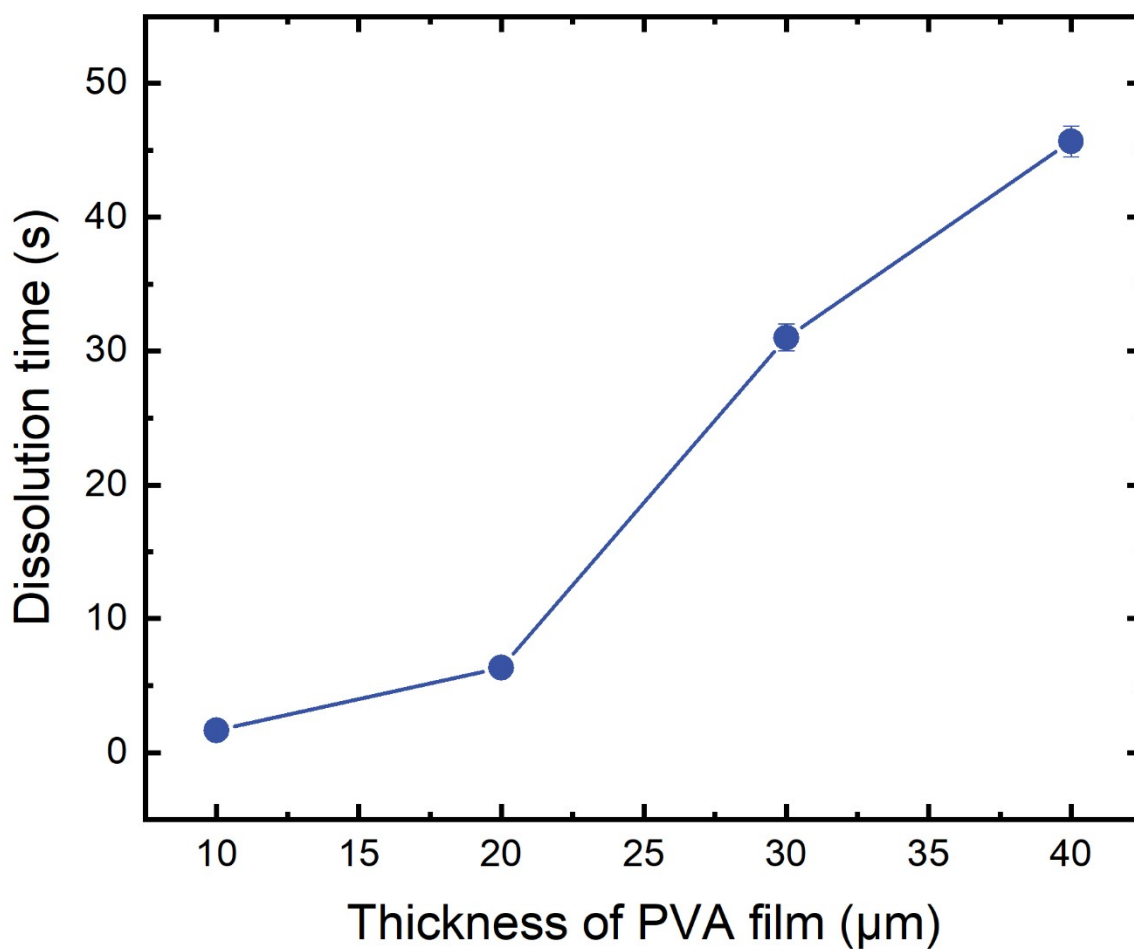

**Figure S1.** Characterization of time delays created by dissolution of different thickness of PVA film. Note: If no error bars are shown, the s.d. is smaller than the size of the symbol representing the mean in the graph.

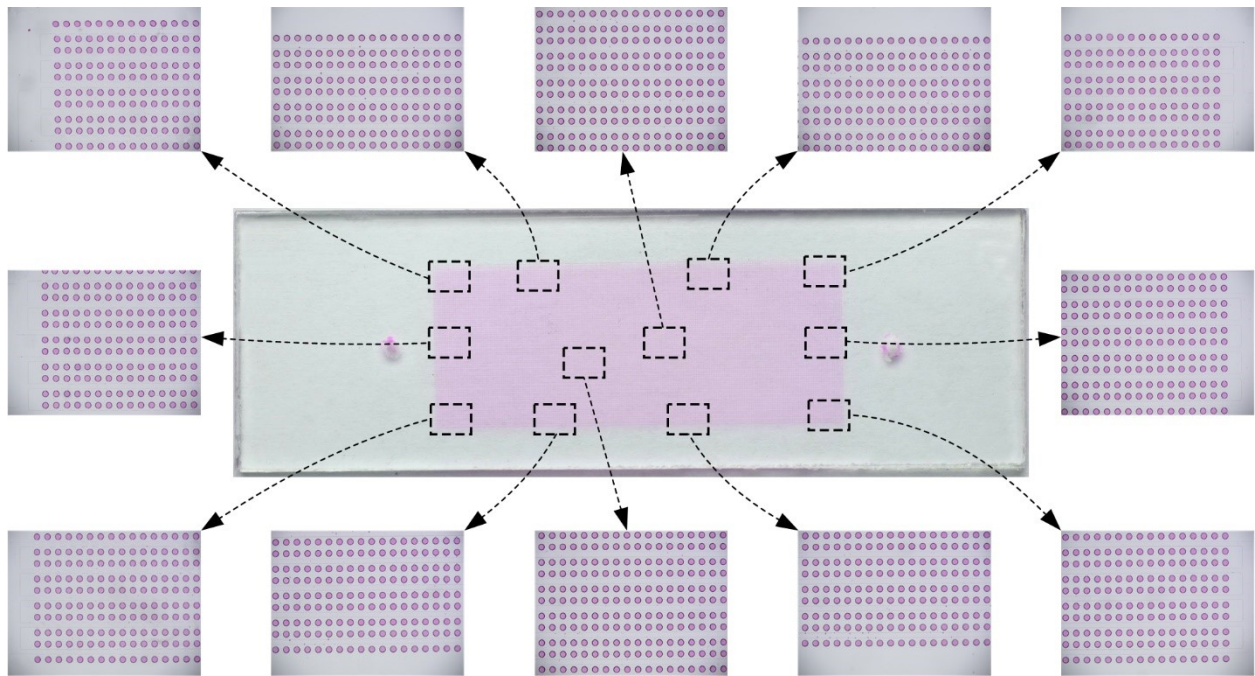

**Figure S2.** Microscopic images of the partitioned droplets at twelve representative positions randomly selected from the microwell array chip. All images show 100% filling and discretization of sample, demonstrating that our sample discretization system can provide a robust and effective means to generate monodisperse partitions for digital bioassays.

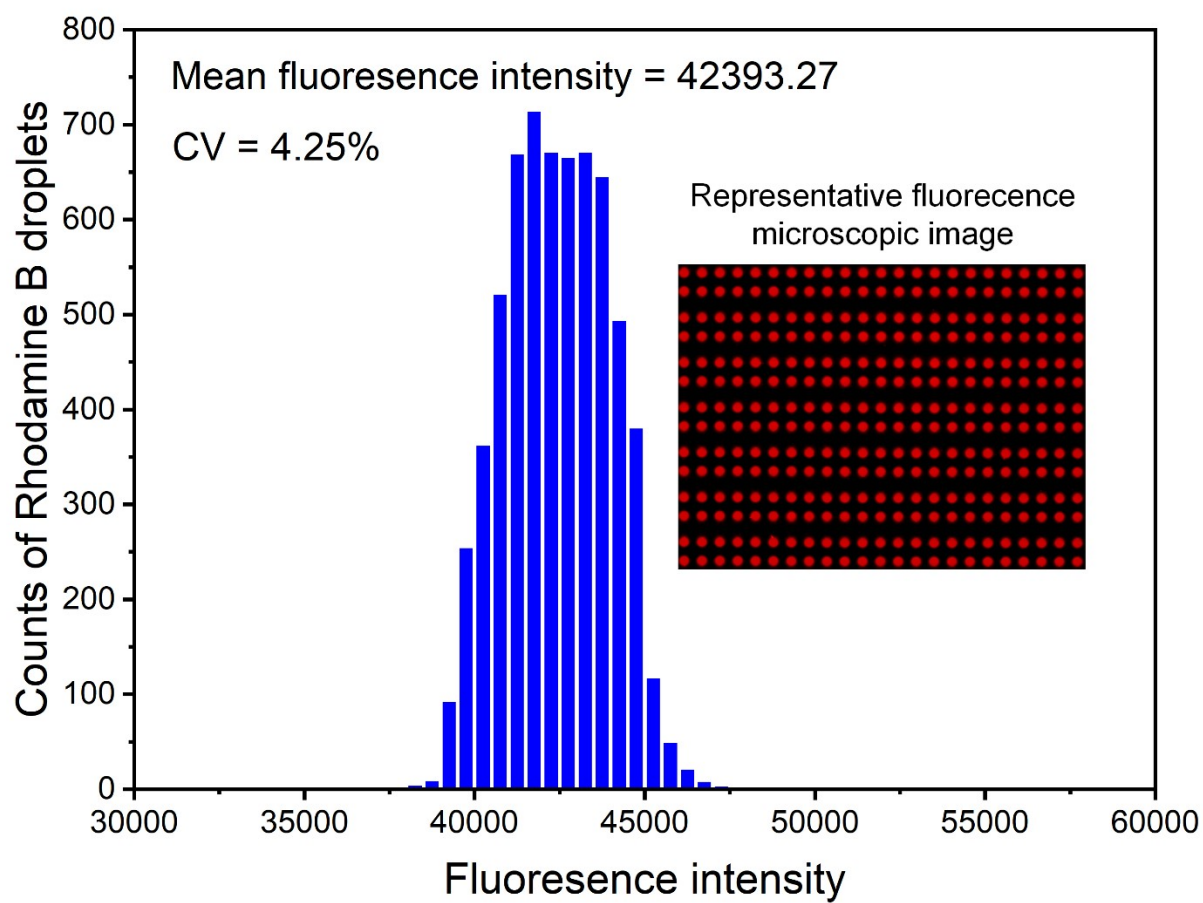

**Figure S3.** Histogram of the distribution of the total fluorescence intensities of 6,400 partitioned Rhodamine B droplets randomly selected from a discretized chip.
